# Supplementary material
Source: PubMed Central journal article supplement (PMC4160382)
Supplement: NIHMS615245-supplement-01.pdf [file NIHMS615245-supplement-01.pdf]

Supplementary Table 1. Analysis of factors impacting recurrence free survival in patients with cervical cancer

| Effect                                     | Univariate |           |           |              | Multivariate |           |           |              |
|--------------------------------------------|------------|-----------|-----------|--------------|--------------|-----------|-----------|--------------|
|                                            | HR         | 95%<br>LB | 95%<br>UB | p-value      | HR           | 95%<br>LB | 95%<br>UB | p-value      |
| Age at exenteration                        | 0.97       | 0.95      | 1.00      | <b>0.026</b> | 0.98         | 0.95      | 1.02      | 0.327        |
| Body mass index                            | 0.98       | 0.94      | 1.02      | 0.311        | 0.98         | 0.94      | 1.02      | 0.353        |
| Interval from<br>treatment to exent        | 0.96       | 0.93      | 1.00      | <b>0.040</b> | 0.97         | 0.91      | 1.02      | 0.233        |
| Primary treatment<br>(Ref radiation alone) |            |           |           |              |              |           |           |              |
| Chemoradiation                             | 1.28       | 0.59      | 2.79      | 0.530        | 0.77         | 0.31      | 1.94      | 0.585        |
| Other                                      | 1.78       | 0.98      | 3.06      | 0.061        | 1.12         | 0.58      | 2.17      | 0.737        |
| Positive margins                           | 1.30       | 0.61      | 2.74      | 0.496        | 0.90         | 0.38      | 2.11      | 0.805        |
| Lymphovascular<br>space invasion           | 2.22       | 1.29      | 3.83      | <b>0.004</b> | 2.12         | 1.07      | 4.20      | <b>0.031</b> |
|                                            |            |           |           |              | 1.05         | 0.52      | 2.12      | 0.887        |

|                      |      |      |      |              |      |      |       |              |
|----------------------|------|------|------|--------------|------|------|-------|--------------|
| Perineural invasion  | 1.56 | 0.88 | 2.76 | 0.127        |      |      |       |              |
| Positive lymph nodes | 3.06 | 1.20 | 7.77 | <b>0.019</b> | 3.83 | 1.22 | 11.99 | <b>0.021</b> |

ACCEPTED MANUSCRIPT

Supplementary Table 2. Analysis of factors impacting overall survival in patients with cervical cancer

| Effect                                     | Univariate |           |           |              | Multivariate |           |           |              |
|--------------------------------------------|------------|-----------|-----------|--------------|--------------|-----------|-----------|--------------|
|                                            | HR         | 95%<br>LB | 95%<br>UB | p-value      | HR           | 95%<br>LB | 95%<br>UB | p-value      |
| Age at exenteration                        | 0.98       | 0.96      | 1.00      | 0.086        | 0.99         | 0.96      | 1.02      | 0.421        |
| Body mass index                            | 0.97       | 0.92      | 1.01      | 0.126        | 0.97         | 0.93      | 1.01      | 0.119        |
| Primary treatment<br>(Ref radiation alone) |            |           |           |              |              |           |           |              |
| Chemoradiation                             | 1.58       | 0.71      | 3.50      | 0.263        | 1.19         | 0.48      | 2.91      | 0.710        |
| Other                                      | 1.90       | 1.04      | 3.48      | <b>0.038</b> | 1.59         | 0.83      | 3.05      | 0.165        |
| Positive margins                           | 1.26       | 0.57      | 2.80      | 0.570        | 0.70         | 0.29      | 1.68      | 0.423        |
| Lymphovascular<br>space invasion           | 2.57       | 1.46      | 4.52      | <b>0.001</b> | 2.29         | 1.17      | 4.48      | <b>0.015</b> |
| Perineural invasion                        | 1.83       | 1.02      | 3.28      | <b>0.043</b> | 1.31         | 0.66      | 2.58      | 0.439        |
|                                            |            |           |           |              |              |           |           |              |

|                         |      |      |      |       |      |      |      |       |
|-------------------------|------|------|------|-------|------|------|------|-------|
| Positive lymph<br>nodes | 1.99 | 0.79 | 5.03 | 0.147 | 1.96 | 0.71 | 5.42 | 0.196 |
|-------------------------|------|------|------|-------|------|------|------|-------|

ACCEPTED MANUSCRIPT
